# Supplementary material for: Using Multi-Instance Hierarchical Clustering Learning System to Predict Yeast Gene Function
Source: PLoS One. 2014 Mar 12;9(3):e90962. doi: 10.1371/journal.pone.0090962 (PMC3951281; doi:10.1371/journal.pone.0090962)
Supplement: Table S9 — Average TPR and FPR obtained from the elution dataset by MLKNN. (XLS) [file pone.0090962.s017.xls]

## Sheet: Sheet1
		Parameter setting for n%
		0.2		0.4		0.6		0.8
Method	Parameters	TPR	FPR	TPR	FPR	TPR	FPR	TPR	FPR
GNC	λ=10	0.585	0.471	0.582	0.434	0.586	0.408	0.591	0.399
	λ=20	0.559	0.451	0.574	0.427	0.578	0.411	0.591	0.404
	λ=30	0.54	0.446	0.55	0.424	0.571	0.425	0.578	0.414
	λ=40	0.534	0.445	0.544	0.426	0.552	0.415	0.558	0.408
	λ=50	0.534	0.447	0.546	0.433	0.544	0.414	0.554	0.416
GOLC	ι=1	0.526	0.446	0.542	0.445	0.559	0.449	0.567	0.442
	ι=2	0.535	0.447	0.535	0.429	0.549	0.419	0.55	0.416
	ι=3	0.563	0.455	0.565	0.42	0.579	0.407	0.569	0.397
	ι=4	0.573	0.455	0.574	0.427	0.571	0.411	0.577	0.397
MIHC	null	0.749	0.433	0.701	0.335	0.739	0.308	0.736	0.283
